# Supplementary material for: Climatology and Trends in Concurrent Temperature Extremes in the Global Extratropics
Source: Copernicus journal article supplement (doi:10.5194/esd-2023-45), 2024-01-22

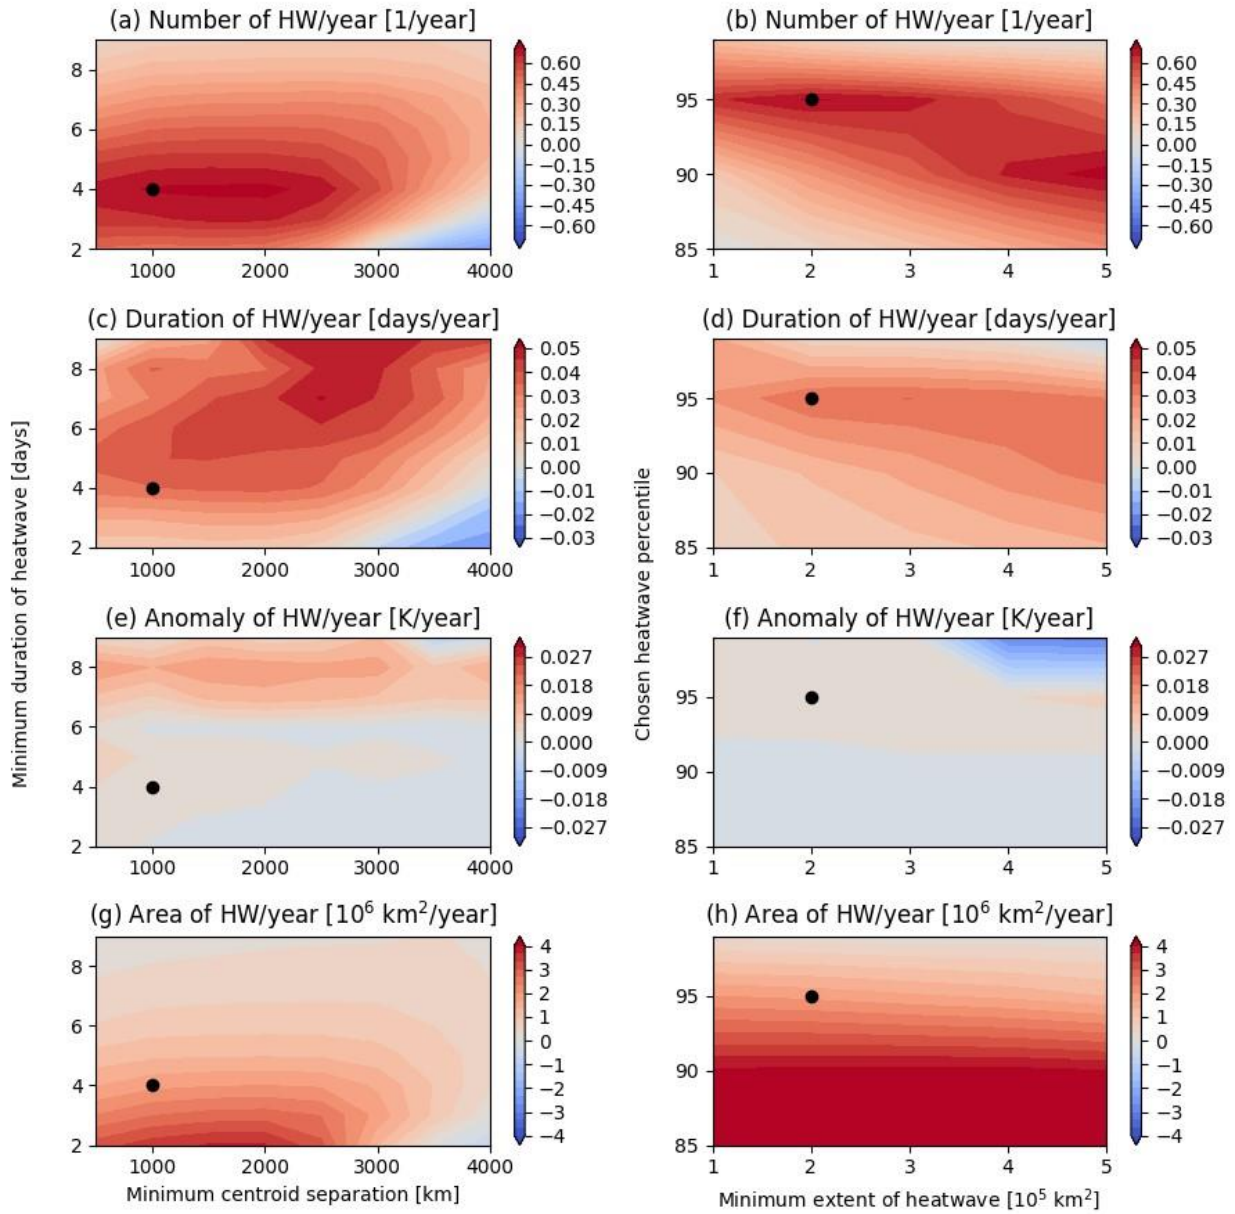

Supplement: Supplementary file [file esd-2023-45-AC2-supplement.pdf]
